# Supplementary material for: Pathways to optimal diabetes management in primary care: an exploration of the role of social determinants of health among patients with diabetes in JS County, China
Source: Research Square preprint supplement (doi:10.21203/rs.3.rs-8586598/v1), 2026-02-19
Supplement: Supplementary file 1 [file 872028a509e543235817da14.pdf]

Questionnaire Code □□□□□□□□

Type (tick): Sampling

Substitute

**Informed Consent Form for the Survey on Service Demand  
and Utilisation for Chronic Disease Management (Hypertension  
and Diabetes) in Jiashan County**

The Institute of Social Management at Beijing Normal University, in collaboration with the School of Health Management at Inner Mongolia Medical University, is currently conducting a "Survey on Service Demand and Utilisation for Chronic Disease Management (Hypertension and Diabetes) in Jiashan County". This questionnaire targets hypertension and diabetes patients aged 40 years and above residing in Jiashan County. The survey covers physical health status, disease burden, digital technology management, lifestyle habits, medical and social support, medication usage, psychological coping with illness, and healthcare service utilization. Its purpose is to provide evidence for formulating chronic disease management service policies in Jiashan County. We sincerely hope you will participate in this interview to share your valuable insights and opinions. Should you agree, please sign the consent form below and provide your contact telephone number. All information gathered during this survey will be treated with strict confidentiality; no other individuals or organization will have access to these details. Participation in this survey interview is entirely voluntary, and you may discontinue at any time. Should physical or mental health conditions prevent you from responding, a family member may answer on your behalf; in such cases, please have the family member sign this consent form.

Your participation will greatly assist the government in formulating public health and healthcare service policies. Thank you for your cooperation. We wish you good health and happiness!

---

**Consent Form**

**Elderly Person** (Name) \_\_\_\_\_ Consents to be interviewed by government personnel conducting the "Survey on the Demand for and Utilisation of Chronic Disease Management Services in Jiashan County".

**Signature of the Elderly Person:** \_\_\_\_\_ ; **Telephone:** \_\_\_\_\_ ;

**Signature of proxy:** \_\_\_\_\_ ; **Relationship between proxy signatory and elderly person:** \_\_\_\_\_ ;

## **Instructions for Completing the Form**

1. Please tick (✓) the appropriate answer number after each question or fill in the answer in the space provided ( ).
2. Unless otherwise specified, only one answer may be selected per question.
3. When completing this questionnaire, please answer independently without consulting others.

## Diabetes Patient Survey Questionnaire

| Question Number          | Question and Options                                                                                                                                                                                                                                                                                                                                    |
|--------------------------|---------------------------------------------------------------------------------------------------------------------------------------------------------------------------------------------------------------------------------------------------------------------------------------------------------------------------------------------------------|
| T01                      | Respondent: (1) Patient themselves ( <b>proceed to TA1</b> ) (2) Patient themselves and relative (3) Relative (4) Patient themselves and village doctor<br>(5) Village doctor (6) Other (please specify in text)                                                                                                                                        |
| T02                      | Reasons for patient not answering questions or all questions( 1 )Inability to correctly understand and answer questions (2) Language communication barriers (3)<br>Other (please specify in text) ( )                                                                                                                                                   |
| T03                      | Is the patient's condition <b>diabetes mellitus</b> ? If hypertension, please use the <b>hypertension</b> questionnaire.                                                                                                                                                                                                                                |
| <b>Basic Information</b> |                                                                                                                                                                                                                                                                                                                                                         |
| TA1                      | What is your age? ( )                                                                                                                                                                                                                                                                                                                                   |
| TA2                      | Your gender: (1) Male (2) Female                                                                                                                                                                                                                                                                                                                        |
| TA3                      | Your level of education: (1) No schooling (2) Primary school (3) Secondary school (4) Senior secondary/technical college<br>(5) Secondary vocational school/technical college (6) College/Diploma (7) Undergraduate degree and above                                                                                                                    |
| TA4                      | Your marital status: (1) Married (2) Unmarried (3) Divorced (4) Widowed                                                                                                                                                                                                                                                                                 |
| TA5                      | Current cohabitation status: (1) Spouse (2) Living alone (3) Children (4) Spouse and children<br>(5) Domestic helper helper and children (6) Spouse, children and domestic helper (7) Domestic (8) Other                                                                                                                                                |
| TA6                      | Your current employment status: (1) Employed (2) Unemployed or seeking employment (3) Retired                                                                                                                                                                                                                                                           |
| TA7                      | Your occupation type (including those previously employed but currently unemployed or retired): (1) Agricultural worker (2) Commercial/service worker<br>(3) Self-employed (4) General office staff (5) Manager in government agencies, enterprises or public institutions (6) Professional and technical personnel<br>(7) Military personnel (8) Other |
| TA8                      | Which type of medical insurance do you primarily use? (1) Publicly funded medical care (2) Basic Employee Medical Insurance (3) Urban Resident Basic Medical Insurance<br>(4) Other medical insurance (5) No insurance whatsoever                                                                                                                       |
| TA9                      | Are you classified as a local impoverished household? (1) Yes (2) No ( <b>proceed to TA12</b> )                                                                                                                                                                                                                                                         |
| TA10                     | Are you registered as a local low-income household? (1) Yes (2) No ( <b>proceed to TA12</b> )                                                                                                                                                                                                                                                           |

|                                          |                                                                                                                                                                                                                                                                                                                                                                                                                                                                                                                                                                                                                                                                                                                                                                                                                                                                                                                                      |
|------------------------------------------|--------------------------------------------------------------------------------------------------------------------------------------------------------------------------------------------------------------------------------------------------------------------------------------------------------------------------------------------------------------------------------------------------------------------------------------------------------------------------------------------------------------------------------------------------------------------------------------------------------------------------------------------------------------------------------------------------------------------------------------------------------------------------------------------------------------------------------------------------------------------------------------------------------------------------------------|
| TA11                                     | <p>If you are classified as a low-income household or a recipient of local subsistence allowances, what do you consider to be the primary cause of your financial hardship?</p> <p>(1) Limited labour force (2) Adverse natural conditions or disasters (3) Loss of labour capacity due to illness or injury</p> <p>(4) Medical treatment expenses (5) Unemployment or lack of employment (6) Human factors (7) Other</p>                                                                                                                                                                                                                                                                                                                                                                                                                                                                                                            |
| TA12                                     | 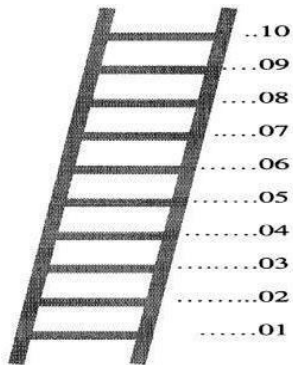 <p>This ladder represents the varying socioeconomic statuses of different households, with higher levels indicating greater socioeconomic standing. For instance, 01 denotes the lowest rung of society, where individuals from these households endure the most challenging living conditions, possessing the lowest educational attainment, the least dignified occupations, and the most meagre incomes; 10 signifies the highest rung, where individuals from these households enjoy the most affluent living conditions, possessing the highest educational attainment, the most dignified occupations, and the most substantial incomes.</p> <p>Now, considering your circumstances, reflect on where you believe your household ranks on this ladder within your community or village? ( )</p> <p>(Please select a number from 1 to 10)</p> |
| TA13                                     | <p>The distance from your home to the nearest medical facility is ( ) kilometres away, and the quickest journey to reach it takes ( ) minutes, and the primary mode of transport is ( ).</p>                                                                                                                                                                                                                                                                                                                                                                                                                                                                                                                                                                                                                                                                                                                                         |
| <b>Disease burden situation</b>          |                                                                                                                                                                                                                                                                                                                                                                                                                                                                                                                                                                                                                                                                                                                                                                                                                                                                                                                                      |
| TB1                                      | At present, your household comprises ( ) persons? (referring to registered household members)                                                                                                                                                                                                                                                                                                                                                                                                                                                                                                                                                                                                                                                                                                                                                                                                                                        |
| TB2                                      | Over the past year, your household's income was approximately ( ) yuan? <small>Income should ideally be expressed as a numerical value.</small>                                                                                                                                                                                                                                                                                                                                                                                                                                                                                                                                                                                                                                                                                                                                                                                      |
| TB3                                      | Over the past year, your personal income was approximately ( ) yuan?                                                                                                                                                                                                                                                                                                                                                                                                                                                                                                                                                                                                                                                                                                                                                                                                                                                                 |
| TB4                                      | Over the past year, your household's expenditure on living expenses was approximately ( ) yuan?                                                                                                                                                                                                                                                                                                                                                                                                                                                                                                                                                                                                                                                                                                                                                                                                                                      |
| TB5                                      | Over the past year, what was your total expenditure on personal medical expenses? ( ) yuan?                                                                                                                                                                                                                                                                                                                                                                                                                                                                                                                                                                                                                                                                                                                                                                                                                                          |
| TB6                                      | <p>Of this amount, how much did you spend on diabetes treatment? ( ) yuan?</p> <p>Of this amount, the proportion reimbursable by medical insurance was ( )</p>                                                                                                                                                                                                                                                                                                                                                                                                                                                                                                                                                                                                                                                                                                                                                                       |
| TB7                                      | During the past year, were you admitted to hospital? (1) Yes (2) No <b>(proceed to TC1)</b>                                                                                                                                                                                                                                                                                                                                                                                                                                                                                                                                                                                                                                                                                                                                                                                                                                          |
| TB8                                      | Transportation costs incurred due to hospitalisation ( ) yuan?                                                                                                                                                                                                                                                                                                                                                                                                                                                                                                                                                                                                                                                                                                                                                                                                                                                                       |
| TB9                                      | Your attendant care expenses incurred due to hospitalisation ( ) yuan?                                                                                                                                                                                                                                                                                                                                                                                                                                                                                                                                                                                                                                                                                                                                                                                                                                                               |
| <b>Basic health and medication usage</b> |                                                                                                                                                                                                                                                                                                                                                                                                                                                                                                                                                                                                                                                                                                                                                                                                                                                                                                                                      |
| TC1                                      | When were you diagnosed with diabetes? ( )                                                                                                                                                                                                                                                                                                                                                                                                                                                                                                                                                                                                                                                                                                                                                                                                                                                                                           |

|                                    |                                                                                                                                                                                                                                                                                                                                                          |       |              |            |        |
|------------------------------------|----------------------------------------------------------------------------------------------------------------------------------------------------------------------------------------------------------------------------------------------------------------------------------------------------------------------------------------------------------|-------|--------------|------------|--------|
| TC2                                | How was your diabetes confirmed?<br>(1) Village health clinic (2) Consultation at a township health centre (3) Consultation at a district central hospital (4) Consultation at another district hospital<br>(5) Township health centre medical examination (6) Private clinic consultation (7) Self-monitoring (8) Other ( )                             |       |              |            |        |
| TC3                                | How severe do you personally perceive your diabetes to be?<br>(1) Very severe (2) Serious (3) Moderate (4) Mild (5) Very mild                                                                                                                                                                                                                            |       |              |            |        |
| TC4                                | In diabetes management, what is your level of management?<br>(1) Conventional management (2) Intensive management                                                                                                                                                                                                                                        |       |              |            |        |
| TC5                                | Are you currently taking medication to control your blood sugar? (1) Yes ( <b>proceed to TC7</b> ) (2) No                                                                                                                                                                                                                                                |       |              |            |        |
| TC6                                | Reason for not taking medication? ( <b>Proceed to TD1</b> )<br>(1) No medication required as per doctor's advice to require medication (2) I consider my condition not severe enough (3) Unable to afford medication<br>(4) Discontinuation of medication due to symptom improvement (5) Discontinuation due to inadequate control (6) Other reasons ( ) |       |              |            |        |
| TC7                                | Which level of doctor primarily prescribed your hypoglycaemic medication?<br>(1) District hospital doctor (2) Doctor at a township health centre (3) Village doctor (4) Other ( )                                                                                                                                                                        |       |              |            |        |
| TC8                                | How effective do you find the blood sugar-lowering medication prescribed by your doctor for controlling your blood glucose levels?<br>(1) Not effective (2) Not very well (3) Average (4) Quite good (5) Very good                                                                                                                                       |       |              |            |        |
| <b>Medication adherence status</b> |                                                                                                                                                                                                                                                                                                                                                          |       |              |            |        |
|                                    |                                                                                                                                                                                                                                                                                                                                                          | Never | Occasionally | Frequently | Always |
| Type 1 diabetes                    | Do you often forget to take your medication?                                                                                                                                                                                                                                                                                                             | 1     | 2            | 3          | 4      |
| TD2                                | Do you often decide not to take your medication?                                                                                                                                                                                                                                                                                                         | 1     | 2            | 3          | 4      |
| TD3                                | Do you often forget to collect your prescriptions?                                                                                                                                                                                                                                                                                                       | 1     | 2            | 3          | 4      |
| TD4                                | Do you typically experience medication discontinuation?                                                                                                                                                                                                                                                                                                  | 1     | 2            | 3          | 4      |
| TD5                                | If you feel your symptoms are improving, would you stop taking your medication as prescribed?                                                                                                                                                                                                                                                            | 1     | 2            | 3          | 4      |
| TD6                                | If you feel unwell, would you skip taking your medication on time?                                                                                                                                                                                                                                                                                       | 1     | 2            | 3          | 4      |
| TD7                                | Do you often forget to take your medication on time?                                                                                                                                                                                                                                                                                                     | 1     | 2            | 3          | 4      |
| TD8                                | Do you frequently alter your medication dosage according to your own needs (such as reducing or increasing the dose yourself)?                                                                                                                                                                                                                           | 1     | 2            | 3          | 4      |

|                                          |                                                                                                                                                                                                                                                       |                    |                            |                          |            |                 |
|------------------------------------------|-------------------------------------------------------------------------------------------------------------------------------------------------------------------------------------------------------------------------------------------------------|--------------------|----------------------------|--------------------------|------------|-----------------|
| TD9                                      | If the medication is taken more than once daily, do you often forget to take it?                                                                                                                                                                      | 1                  | 2                          | 3                        | 4          |                 |
| TD10                                     | Do you often plan ahead for prescriptions before your medication runs out?                                                                                                                                                                            | 1                  | 2                          | 3                        | 4          |                 |
| <b>Lifestyle habits</b>                  |                                                                                                                                                                                                                                                       |                    |                            |                          |            |                 |
| TE1                                      | Have you taken care to reduce your intake of salt or foods high in salt (such as salted fish, pickled vegetables, cured meats, etc.)?<br>(1) Never (2) Occasionally (3) Sometimes (4) Often (5) Always                                                |                    |                            |                          |            |                 |
| TE2                                      | Have you been mindful of reducing your intake of foods high in cholesterol or fats (such as fatty meats, fried foods, etc.)?<br>(1) Never (2) Occasionally (3) Sometimes (4) Often (5) Always                                                         |                    |                            |                          |            |                 |
| TE3                                      | Do you consistently engage in regular weekly exercise (such as walking, jogging, square dancing, badminton, etc.) three times or more, with each session lasting 30-40 minutes?<br>(1) Never (2) Occasionally (3) Sometimes (4) Frequently (5) Always |                    |                            |                          |            |                 |
| TE4                                      | Do you smoke? (1) Yes (2) No ( <b>proceed to TE7</b> ) (3) Have quit ( <b>Go to TE7</b> )                                                                                                                                                             |                    |                            |                          |            |                 |
| TE5                                      | Have you consciously decided to quit smoking and started the process? (1) Yes ( <b>proceed to TE7</b> ) (2) No                                                                                                                                        |                    |                            |                          |            |                 |
| TE6                                      | Looking back over the past 7 days, what was your average daily consumption of cigarettes? ( )<br>cigarettes (Note: One liang of local tobacco = 10 cigarettes; one stick = 5 cigarettes)                                                              |                    |                            |                          |            |                 |
| TE7                                      | Do you drink alcohol? (1) Yes (2) No ( <b>proceed to TF1</b> ) (3) Abstinent ( <b>proceed to TF1</b> )                                                                                                                                                |                    |                            |                          |            |                 |
| TE8                                      | How frequently do you drink alcohol? (1) At least 3 times per week (2) 1-2 times per week (3) Less than once a week                                                                                                                                   |                    |                            |                          |            |                 |
| TE9                                      | Have you consciously attempted to reduce your alcohol consumption and begun limiting your drinking? (1) Yes (2) No                                                                                                                                    |                    |                            |                          |            |                 |
| TE10                                     | Your typical drinking volume per occasion is ( ) Two (Note: Refers to baijiu. One bottle of beer = 1 liang baijiu; 1 jin of wine = 5 liang baijiu; 1 can of beer = 1 liang of baijiu; 1 jin of huangjiu = 6.5 liang of baijiu)                        |                    |                            |                          |            |                 |
| <b>Electronic health literacy status</b> |                                                                                                                                                                                                                                                       |                    |                            |                          |            |                 |
|                                          |                                                                                                                                                                                                                                                       | Very poor<br>Agree | Somewhat disagree<br>Agree | Don't know<br>Don't know | Some agree | Very much agree |
| TF1                                      | Do you know how to search online for useful health and wellbeing resources?                                                                                                                                                                           | 1                  | 2                          | 3                        | 4          | 5               |
| TF2                                      | Do you know how to use the internet to find answers to your health questions?                                                                                                                                                                         | 1                  | 2                          | 3                        | 4          | 5               |
| TF3                                      | What health and wellness resources are available online?                                                                                                                                                                                              | 1                  | 2                          | 3                        | 4          | 5               |

|                                                                                       |                                                                                                                                                                                                                                                                                                                                                                                                                                                                         |   |   |   |   |   |
|---------------------------------------------------------------------------------------|-------------------------------------------------------------------------------------------------------------------------------------------------------------------------------------------------------------------------------------------------------------------------------------------------------------------------------------------------------------------------------------------------------------------------------------------------------------------------|---|---|---|---|---|
| TF4                                                                                   | Do you know where to find useful health and wellbeing resources online?                                                                                                                                                                                                                                                                                                                                                                                                 | 1 | 2 | 3 | 4 | 5 |
| TF5                                                                                   | Do you know how to utilise the online health resources you've accessed to help yourself?                                                                                                                                                                                                                                                                                                                                                                                | 1 | 2 | 3 | 4 | 5 |
| TF6                                                                                   | Do you possess the skills to evaluate the quality of online health and medical resources?                                                                                                                                                                                                                                                                                                                                                                               | 1 | 2 | 3 | 4 | 5 |
| TF7                                                                                   | Are you able to distinguish between high-quality and low-quality health information resources online?                                                                                                                                                                                                                                                                                                                                                                   | 1 | 2 | 3 | 4 | 5 |
| TF8                                                                                   | You feel more confident about making health-related decisions based on information found online                                                                                                                                                                                                                                                                                                                                                                         | 1 | 2 | 3 | 4 | 5 |
| <b>Utilisation of Smart Health Chronic Disease Management and Healthcare Services</b> |                                                                                                                                                                                                                                                                                                                                                                                                                                                                         |   |   |   |   |   |
| TG1                                                                                   | Have you ever used a hospital self-service registration kiosk to book an appointment? (1) Yes (2) No (3) Not sure                                                                                                                                                                                                                                                                                                                                                       |   |   |   |   |   |
| TG2                                                                                   | Have you ever used a hospital data collector to examine your body and collect basic data?<br>(1) Yes (2) No (3) Not sure                                                                                                                                                                                                                                                                                                                                                |   |   |   |   |   |
| TG3                                                                                   | Do you use digital health management mini-programmes (such as the Jiashan 12320 mini-programme) for appointment booking?<br>(1) Yes (2) No                                                                                                                                                                                                                                                                                                                              |   |   |   |   |   |
| TG4                                                                                   | Do you use the chronic disease management feature within digital health management mini-programmes (e.g., the Jiashan 12320 mini-programme)?<br>(1) Yes (2) No ( <b>proceed to TG11</b> )                                                                                                                                                                                                                                                                               |   |   |   |   |   |
| TG5                                                                                   | What are your reasons for using the chronic disease management feature within digital health management mini-programmes (e.g., Jiashan 12320 Mini-Program)? ( <b>Multiple selections permitted</b> )<br>(1) To verify disease information according to medical advice (2) To remind myself to self-manage<br>(3) To view my own disease information<br>(4) To learn health knowledge (5) Other ( )                                                                      |   |   |   |   |   |
| TG6                                                                                   | Which features do you primarily use within digital health management mini-programmes (such as the Jiashan 12320 mini-programme)? ( <b>Multiple selections permitted</b> )<br>(1) Smart triage function (2) Appointment booking function (3) Report retrieval function (4) Healthcare evaluation function (5) Health records functionality<br>(6) Health Consultation Function (7) Chronic Disease Management Assistant (8) Medication Enquiry Function (9) Other<br>( ) |   |   |   |   |   |
| TG7                                                                                   | Compared to the past, do you find the health management mini-programme (Jiashan 12320 Mini-Programme) makes it easier for you to access medical assistance?<br>(1) Yes (2) No (3) No change                                                                                                                                                                                                                                                                             |   |   |   |   |   |

|                                               |                                                                                                                                                                                                                                                                                                                                                                                                                                                                                                 |
|-----------------------------------------------|-------------------------------------------------------------------------------------------------------------------------------------------------------------------------------------------------------------------------------------------------------------------------------------------------------------------------------------------------------------------------------------------------------------------------------------------------------------------------------------------------|
| TG8                                           | <p>Compared to the past, in which aspects do you believe the health management mini-program (Jiashan 12320 Mini-Program) has facilitated your chronic disease management?</p> <p><b>(Multiple selections permitted)</b></p> <p>(1) Appointment booking<br/>Medication management</p> <p>(2) Health education and self-management<br/>(3) Health assessment and medical decision-making</p> <p>(4) Health assessment and medical decision-making</p> <p>(5) Contacting Medical Practitioners</p> |
| TG9                                           | <p>Compared to the past, would you be more inclined to proactively contact your doctor due to the convenience offered by the health management mini-programme (Jiashan 12320 Mini-Programme)?</p> <p>(1) Yes                      (2) No                      (3) No change</p>                                                                                                                                                                                                                 |
| TG10                                          | <p>How effective do you consider the health management mini-program (Jiashan 12320 Mini-Program) and online communication to be in assisting your chronic disease management?</p> <p>(1) Extremely helpful (2) Somewhat helpful (3) Not very helpful (4) Not at all helpful</p>                                                                                                                                                                                                                 |
| TG11                                          | <p>Do you and your GP use online communication tools (such as WeChat, text messages, phone calls, etc.) for chronic disease management discussions?</p> <p>(1) Yes                      (2) No <b>(proceed to TG13)</b></p>                                                                                                                                                                                                                                                                     |
| TG12                                          | <p>How frequently do you and your GP use online communication tools (such as WeChat, text messages, telephone, etc.) for chronic disease management discussions?</p> <p>(1) Never                      (2) Once every three months                      (3) Every two months (4) Once a month</p> <p>(5) Every fortnight</p> <p>(6) Once a week                      (7) Almost daily</p>                                                                                                       |
| TG13                                          | <p>In the past year, have you visited your local village health centre (community health service station) for diabetes-related reasons?</p> <p>(1) Yes, (                      ) times/year; (2) No</p>                                                                                                                                                                                                                                                                                         |
| TG14                                          | <p>In the past year, have you visited a local health centre (community health service centre) for diabetes-related reasons?</p> <p>(1) Yes, (                      ) times per year; (2) No</p>                                                                                                                                                                                                                                                                                                 |
| TG15                                          | <p>In the past year, have you been hospitalised for diabetes? (1) Yes (                      ) times/year; (2) No</p>                                                                                                                                                                                                                                                                                                                                                                           |
| <b>Family Doctor Follow-up Service Status</b> |                                                                                                                                                                                                                                                                                                                                                                                                                                                                                                 |
| TH1                                           | Over the past three months, how many times have you measured your blood glucose? (                      ) times                                                                                                                                                                                                                                                                                                                                                                                 |
| TH2                                           | Of these, how many were measured by your community doctor during follow-up visits? (                      ) times                                                                                                                                                                                                                                                                                                                                                                               |
| TH3                                           | <p>What methods do you primarily use to measure your blood glucose? <b>(multiple selections permitted)</b></p> <p>(1) Follow-up visits                      (2) Health check-ups                      (3) Measurement during visits to district-level medical institutions                      (4) Proactively visiting community centres for blood glucose testing</p> <p>(5) Self-monitoring of blood glucose                      (6) Other</p>                                             |
| TH4                                           | <p>Have you received follow-up services from your GP? (1) Yes                      (2) No <b>(proceed to TH8)</b></p> <p>(3) Not sure</p>                                                                                                                                                                                                                                                                                                                                                       |





|                                   |                                                                                                                                                                      |                          |                            |                    |                    |                          |   |   |   |
|-----------------------------------|----------------------------------------------------------------------------------------------------------------------------------------------------------------------|--------------------------|----------------------------|--------------------|--------------------|--------------------------|---|---|---|
| TJ4                               | Over the past seven days, on how many days did you consume high-fat foods such as red meat or full-fat dairy products?                                               | 0                        | 1                          | 2                  | 3                  | 4                        | 5 | 6 | 7 |
| TJ5                               | Over the past seven days, on how many days did you distribute your carbohydrates evenly across each meal?<br>?                                                       | 0                        | 1                          | 2                  | 3                  | 4                        | 5 | 6 | 7 |
| TJ6                               | Over the past seven days, on how many days did you engage in at least 30 minutes of physical activity?<br>? (Total continuous activity time, including walking)      | 0                        | 1                          | 2                  | 3                  | 4                        | 5 | 6 | 7 |
| TJ7                               | Over the past seven days, excluding household chores, on how many days did you engage in dedicated exercise<br>(such as walking or practising Tai Chi)?              | 0                        | 1                          | 2                  | 3                  | 4                        | 5 | 6 | 7 |
| TJ8                               | Over the past seven days, how many days did you monitor your blood glucose?                                                                                          | 0                        | 1                          | 2                  | 3                  | 4                        | 5 | 6 | 7 |
| TJ9                               | Over the past seven days, on how many days did you monitor your blood sugar as frequently as recommended by healthcare professionals?<br>blood glucose levels?       | 0                        | 1                          | 2                  | 3                  | 4                        | 5 | 6 | 7 |
| TJ10                              | Over the past seven days, how many days did you check your feet?                                                                                                     | 0                        | 1                          | 2                  | 3                  | 4                        | 5 | 6 | 7 |
| TJ11                              | Over the past seven days, how many days did you check the inside of your shoes?                                                                                      | 0                        | 1                          | 2                  | 3                  | 4                        | 5 | 6 | 7 |
| TJ12                              | Over the past seven days, how many days did you wash your feet?                                                                                                      | 0                        | 1                          | 2                  | 3                  | 4                        | 5 | 6 | 7 |
| TJ13                              | Over the past seven days, how many days did you soak your feet?                                                                                                      | 0                        | 1                          | 2                  | 3                  | 4                        | 5 | 6 | 7 |
| TJ14                              | Over the past seven days, on how many occasions did you dry between your toes after washing your feet?                                                               | 0                        | 1                          | 2                  | 3                  | 4                        | 5 | 6 | 7 |
| TJ15                              | Over the past seven days, on how many days did you take your diabetes medication exactly as prescribed?<br>(Elderly individuals taking oral medication for diabetes) | 0                        | 1                          | 2                  | 3                  | 4                        | 5 | 6 | 7 |
| TJ16                              | Over the past seven days, on how many days did you inject insulin as prescribed<br>? (Elderly individuals using insulin injections for diabetes treatment)           | 0                        | 1                          | 2                  | 3                  | 4                        | 5 | 6 | 7 |
| Self-efficacy (confidence) status |                                                                                                                                                                      |                          |                            |                    |                    |                          |   |   |   |
|                                   |                                                                                                                                                                      | Not at all<br>Confidence | Confidence<br>Insufficient | Some<br>Confidence | Very<br>Confidence | Absolutely<br>confidence |   |   |   |
| TK1                               | Are you confident you can eat breakfast, lunch and dinner at fixed times every day, consuming a fixed portion sizes?                                                 | 1                        | 2                          | 3                  | 4                  | 5                        |   |   |   |

|                                     |                                                                                                                                                                         |   |   |   |   |   |
|-------------------------------------|-------------------------------------------------------------------------------------------------------------------------------------------------------------------------|---|---|---|---|---|
| TK2                                 | When dining with non-diabetics, are you confident you can maintain your usual portion sizes and food choices?                                                           | 1 | 2 | 3 | 4 | 5 |
| TK3                                 | When you're hungry, are you confident in choosing the right food?                                                                                                       | 1 | 2 | 3 | 4 | 5 |
| TK4                                 | Are you confident you can manage 4-5 sessions of exercise per week, each lasting 15-30 minutes?                                                                         | 1 | 2 | 3 | 4 | 5 |
| TK5                                 | When you exercise, are you confident you can avoid hypoglycaemia?                                                                                                       | 1 | 2 | 3 | 4 | 5 |
| TK6                                 | When your blood sugar rises or falls, are you confident in handling it correctly?                                                                                       | 1 | 2 | 3 | 4 | 5 |
| TK7                                 | When your body undergoes changes, do you feel confident in assessing your physical condition and seek timely medical attention?                                         | 1 | 2 | 3 | 4 | 5 |
| TK8                                 | Do you have confidence in managing your own diabetes condition so that it does not impact your life?<br>do you feel confident you can manage your diabetes effectively? | 1 | 2 | 3 | 4 | 5 |
| TK9                                 | If you follow your doctor's advice, are you confident you can prevent and manage diabetes-related complications?<br>?                                                   | 1 | 2 | 3 | 4 | 5 |
| <b>Diabetes Knowledge Awareness</b> |                                                                                                                                                                         |   |   |   |   |   |
| TL1                                 | Can diabetes be prevented?<br>(1) Yes (2) No(3) Not sure                                                                                                                |   |   |   |   |   |
| TL2                                 | Are obese individuals more susceptible to diabetes?<br>(1) Yes (2) No(3) Not sure                                                                                       |   |   |   |   |   |
| TL3                                 | Do you know the normal fasting blood glucose level for adults?<br>(1) Yes (2) No                                                                                        |   |   |   |   |   |
| TL4                                 | Does "three excesses and one deficiency" refer to excessive thirst, excessive hunger, excessive urination, and weight loss?<br>(1) Yes (2) No (3) Not sure              |   |   |   |   |   |
| TL5                                 | Can diabetes sometimes present with symptoms such as palpitations, trembling hands, excessive sweating, and hunger?<br>(1) Yes (2) No (3) Not sure                      |   |   |   |   |   |
| TL6                                 | Can diabetes cause vision loss? (1) Yes (2) No (3) Not sure                                                                                                             |   |   |   |   |   |
| TL7                                 | Do symptoms of diabetes include itchy skin or recurring boils?<br>(1) Yes (2) No (3) Not sure                                                                           |   |   |   |   |   |

|                                       |                                                                                                                                                                                                                                                                           |                     |                            |                               |                                |                             |                                     |
|---------------------------------------|---------------------------------------------------------------------------------------------------------------------------------------------------------------------------------------------------------------------------------------------------------------------------|---------------------|----------------------------|-------------------------------|--------------------------------|-----------------------------|-------------------------------------|
| TL8                                   | Can you name the complications of diabetes? (Multiple selections possible)<br>Diabetic foot disease (2) Diabetic nephropathy (3) Diabetic eye disease<br>Cardiovascular and cerebrovascular diseases (5) Skin disorders(6) Don't know<br>(7) Other, please specify (    ) |                     |                            |                               |                                |                             |                                     |
| TL9                                   | If diagnosed with diabetes, must treatment be undertaken even in the absence of symptoms?<br>(1) Yes (2) No (3) Not sure                                                                                                                                                  |                     |                            |                               |                                |                             |                                     |
| TL10                                  | Is regular blood glucose monitoring required when treating diabetes?<br>(1) Yes (2) No (3) Not sure                                                                                                                                                                       |                     |                            |                               |                                |                             |                                     |
| TL11                                  | Is dietary control necessary for treating diabetes?<br>(1) Yes (2) No (3) Not sure                                                                                                                                                                                        |                     |                            |                               |                                |                             |                                     |
| TL12                                  | Is it necessary to increase physical activity appropriately when treating diabetes?<br>(1) Yes (2) No (3) Not sure                                                                                                                                                        |                     |                            |                               |                                |                             |                                     |
| TL13                                  | Can diabetes be controlled through treatment?<br>(1) Yes (2) No (3) Not sure                                                                                                                                                                                              |                     |                            |                               |                                |                             |                                     |
| TL14                                  | After developing diabetes, can medication be discontinued once blood sugar levels normalise?<br>(1) Yes (2) No (3) Not sure                                                                                                                                               |                     |                            |                               |                                |                             |                                     |
| Disease burden (discomfort) situation |                                                                                                                                                                                                                                                                           |                     |                            |                               |                                |                             |                                     |
|                                       |                                                                                                                                                                                                                                                                           | No<br>sensa<br>tion | Mild<br>ly<br>affec<br>ted | Mod<br>erate<br>sensa<br>tion | Sligh<br>tly<br>notic<br>eable | Seve<br>re<br>sensa<br>tion | Very<br>sever<br>e<br>sensa<br>tion |
| TM1                                   | You feel that the doctor lacks knowledge about diabetes and its management.                                                                                                                                                                                               | 0                   | 1                          | 2                             | 3                              | 4                           | 5                                   |
| TM2                                   | Do you feel that diabetes is draining your energy and stamina on a daily basis?                                                                                                                                                                                           | 0                   | 1                          | 2                             | 3                              | 4                           | 5                                   |
| TM3                                   | You feel lacking in confidence regarding your ability to manage diabetes on a daily basis.                                                                                                                                                                                | 0                   | 1                          | 2                             | 3                              | 4                           | 5                                   |
| TM4                                   | Whenever you think about living with diabetes, you feel angry, afraid, and/or depressed.                                                                                                                                                                                  | 0                   | 1                          | 2                             | 3                              | 4                           | 5                                   |
| TM5                                   | Do you feel that your doctor has not clearly explained diabetes management to you?                                                                                                                                                                                        | 0                   | 1                          | 2                             | 3                              | 4                           | 5                                   |
| TM6                                   | You feel you cannot manage to test your blood sugar regularly.                                                                                                                                                                                                            | 0                   | 1                          | 2                             | 3                              | 4                           | 5                                   |
| TM7                                   | You feel your life will end due to long-term complications, regardless of what you                                                                                                                                                                                        | 0                   | 1                          | 2                             | 3                              | 4                           | 5                                   |

|                                 |                                                                                                                                                                                                |   |   |   |   |     |    |
|---------------------------------|------------------------------------------------------------------------------------------------------------------------------------------------------------------------------------------------|---|---|---|---|-----|----|
| TM8                             | You often find yourself at a disadvantage with routine matters due to diabetes.                                                                                                                | 0 | 1 | 2 | 3 | 4   | 5  |
| TM9                             | You feel that friends and family are not sufficiently supportive of you (e.g., planned activities conflict with conflict with your arrangements, or encouraging you to eat the "wrong" foods). | 0 | 1 | 2 | 3 | 4   | 5  |
| TM10                            | Do you feel that diabetes controls your life?                                                                                                                                                  | 0 | 1 | 2 | 3 | 4   | 5  |
| TM11                            | You feel your doctor has not properly considered your concerns.                                                                                                                                | 0 | 1 | 2 | 3 | 4   | 5  |
| TM12                            | You feel you haven't strictly adhered to a good dietary plan.                                                                                                                                  | 0 | 1 | 2 | 3 | 4   | 5  |
| TM13                            | Do you feel that friends and family cannot understand how difficult life is for someone with diabetes?<br>challenging.                                                                         | 0 | 1 | 2 | 3 | 4   | 5  |
| TM14                            | Feeling overwhelmed by some of the demands of living with diabetes.                                                                                                                            | 0 | 1 | 2 | 3 | 4   | 5  |
| TM15                            | You feel that there isn't a doctor who can monitor your diabetes on a very regular basis.                                                                                                      | 0 | 1 | 2 | 3 | 4   | 5  |
| TM16                            | You feel you are not sufficiently proactive in maintaining your diabetes self-management.                                                                                                      | 0 | 1 | 2 | 3 | 4   | 5  |
| TM17                            | You feel that friends and family are unable to provide the emotional support you desire.                                                                                                       | 0 | 1 | 2 | 3 | 4   | 5  |
| <b>Family Support Situation</b> |                                                                                                                                                                                                |   |   |   |   |     |    |
|                                 |                                                                                                                                                                                                |   |   |   |   | Yes | No |
| TN1                             | My family provides me with unwavering support whenever I need it.                                                                                                                              |   |   |   |   | 1   | 0  |
| TN2                             | I can get good advice from my family members.                                                                                                                                                  |   |   |   |   | 1   | 0  |
| TN3                             | My close relationships with family members are not as strong as those with other people.                                                                                                       |   |   |   |   | 1   | 0  |
| TN4                             | After confiding my pain to my closest family member, she (he) felt the same pain.                                                                                                              |   |   |   |   | 1   | 0  |
| TN5                             | My family members are happy to listen to my thoughts.                                                                                                                                          |   |   |   |   | 1   | 0  |
| TN6                             | Much of my happiness is shared with my family members.                                                                                                                                         |   |   |   |   | 1   | 0  |
| TN7                             | I rely on my family members for emotional (mental) support                                                                                                                                     |   |   |   |   | 1   | 0  |
| TN8                             | If I feel down, I can confide in a family member without fear of being mocked afterwards                                                                                                       |   |   |   |   | 1   | 0  |

|                                             |                                                                                                                                                                                                                                                                                                                                                                                   |       |        |              |                  |              |
|---------------------------------------------|-----------------------------------------------------------------------------------------------------------------------------------------------------------------------------------------------------------------------------------------------------------------------------------------------------------------------------------------------------------------------------------|-------|--------|--------------|------------------|--------------|
| TN9                                         | Matters of mutual concern between myself and family members can be openly discussed.                                                                                                                                                                                                                                                                                              | 1     | 0      |              |                  |              |
| TN10                                        | My family members are sensitive to my personal needs.                                                                                                                                                                                                                                                                                                                             | 1     | 0      |              |                  |              |
| TN11                                        | My family members are happy to help me solve problems.                                                                                                                                                                                                                                                                                                                            | 1     | 0      |              |                  |              |
| TN12                                        | I have a good relationship with many members of my family.                                                                                                                                                                                                                                                                                                                        | 1     | 0      |              |                  |              |
| TN13                                        | When I confide in family members, it makes me feel uncomfortable.                                                                                                                                                                                                                                                                                                                 | 1     | 0      |              |                  |              |
| TN14                                        | I feel uncomfortable when others become overly close to my family members.                                                                                                                                                                                                                                                                                                        | 1     | 0      |              |                  |              |
| TN15                                        | I wish my family were different from what it is now.                                                                                                                                                                                                                                                                                                                              | 1     | 0      |              |                  |              |
| <b>Medical and social support situation</b> |                                                                                                                                                                                                                                                                                                                                                                                   |       |        |              |                  |              |
| TP1                                         | <p>How many close relatives and friends do you have (meaning those you find easy to get along with and can confide in)? Please write down the number of close relatives and friends: (    )</p> <p>People sometimes seek companionship, assistance, or other forms of support from others. When you need it, how often do you receive each of the following types of support?</p> |       |        |              |                  |              |
|                                             |                                                                                                                                                                                                                                                                                                                                                                                   | Never | Rarely | Occasionally | Most of the time | All the time |
| TP2                                         | If you are confined to bed rest, someone can assist you.                                                                                                                                                                                                                                                                                                                          | 1     | 2      | 3            | 4                | 5            |
| TP3                                         | When you need to confide, there are certain people you can count on to listen.                                                                                                                                                                                                                                                                                                    | 1     | 2      | 3            | 4                | 5            |
| TP4                                         | During times of hardship and difficulty, someone offers you sound advice or counsel.                                                                                                                                                                                                                                                                                              | 1     | 2      | 3            | 4                | 5            |
| TP5                                         | Should you require it, someone will accompany you to see a doctor.                                                                                                                                                                                                                                                                                                                | 1     | 2      | 3            | 4                | 5            |
| TP6                                         | Someone has expressed their deep affection and concern for you.                                                                                                                                                                                                                                                                                                                   | 1     | 2      | 3            | 4                | 5            |
| TP7                                         | Someone is sharing this moment with you.                                                                                                                                                                                                                                                                                                                                          | 1     | 2      | 3            | 4                | 5            |
| TP8                                         | Someone has provided you with some information to demonstrate that you understood the situation at the time.                                                                                                                                                                                                                                                                      | 1     | 2      | 3            | 4                | 5            |

|                                 |                                                                                         |       |        |              |            |        |
|---------------------------------|-----------------------------------------------------------------------------------------|-------|--------|--------------|------------|--------|
| TP9                             | There is someone worthy of your trust to whom you may confide your affairs or concerns. | 1     | 2      | 3            | 4          | 5      |
| TP10                            | Someone will look after you.                                                            | 1     | 2      | 3            | 4          | 5      |
| TP11                            | Someone is gathering with you for a relaxed time.                                       | 1     | 2      | 3            | 4          | 5      |
| TP12                            | If you are unable to cook for yourself, someone will prepare meals for you.             | 1     | 2      | 3            | 4          | 5      |
| TP13                            | Some people's advice is what you truly crave.                                           | 1     | 2      | 3            | 4          | 5      |
| TP14                            | Having someone to do things with allows you to put your mind at ease.                   | 1     | 2      | 3            | 4          | 5      |
| TP15                            | When you are unwell, someone will take care of your daily chores.                       | 1     | 2      | 3            | 4          | 5      |
| TP16                            | Someone shares your deepest fears and worries.                                          | 1     | 2      | 3            | 4          | 5      |
| TP17                            | You may consult certain individuals regarding how to address personal matters.          | 1     | 2      | 3            | 4          | 5      |
| TP18                            | Someone to share some happy moments with.                                               | 1     | 2      | 3            | 4          | 5      |
| TP19                            | Someone understands your issue.                                                         | 1     | 2      | 3            | 4          | 5      |
| TP20                            | You cherish certain people and derive a sense of being needed.                          | 1     | 2      | 3            | 4          | 5      |
| <b>Psychological Resilience</b> |                                                                                         |       |        |              |            |        |
|                                 |                                                                                         | Never | Rarely | Occasionally | Frequently | Always |
| TQ1                             | When significant changes occur, I am able to adapt to the transition.                   | 1     | 2      | 3            | 4          | 5      |
| TQ2                             | Whatever happens, I can handle it.                                                      | 1     | 2      | 3            | 4          | 5      |
| TQ3                             | When faced with problems, I try to look at things from a positive perspective.          | 1     | 2      | 3            | 4          | 5      |
| TQ4                             | Having endured trials, I have grown stronger.                                           | 1     | 2      | 3            | 4          | 5      |
| TQ5                             | After falling ill, sustaining an injury, or enduring hardship, I recover quite readily. | 1     | 2      | 3            | 4          | 5      |
| TQ6                             | Despite the obstacles, I believe my goals will be realised.                             | 1     | 2      | 3            | 4          | 5      |
| TQ7                             | Under pressure, I remain able to think clearly and focus on the task at hand.           | 1     | 2      | 3            | 4          | 5      |
| TQ8                             | I shall not be discouraged by failure.                                                  | 1     | 2      | 3            | 4          | 5      |

|                                       |                                                                                                                               |                                |                         |                            |                                      |                        |
|---------------------------------------|-------------------------------------------------------------------------------------------------------------------------------|--------------------------------|-------------------------|----------------------------|--------------------------------------|------------------------|
| TQ9                                   | When confronted with life's challenges and difficulties, I am a resilient person.                                             | 1                              | 2                       | 3                          | 4                                    | 5                      |
| TQ10                                  | I am able to handle negative feelings (such as sadness, fear, anger) well.                                                    | 1                              | 2                       | 3                          | 4                                    | 5                      |
| <b>Self-Care Practices</b>            |                                                                                                                               |                                |                         |                            |                                      |                        |
|                                       |                                                                                                                               | Very poor<br>Compliant         | Not<br>Sufficient       | Average                    | conforms                             | Very<br>Compliant      |
| TR1                                   | After failing at things that matter to me, I feel my shortcomings are .                                                       | 1                              | 2                       | 3                          | 4                                    | 5                      |
| TR2                                   | I endeavour to comprehend and tolerate those aspects of my character that I find disagreeable.                                | 1                              | 2                       | 3                          | 4                                    | 5                      |
| TR3                                   | When painful things occur, I endeavour to approach them with equanimity.                                                      | 1                              | 2                       | 3                          | 4                                    | 5                      |
| TR4                                   | When feeling low, I tend to think many people might be happier than me.                                                       | 1                              | 2                       | 3                          | 4                                    | 5                      |
| TR5                                   | I endeavour to view my failures as an inevitable part of life's journey.                                                      | 1                              | 2                       | 3                          | 4                                    | 5                      |
| TR6                                   | When times are tough, I will look after and treat myself kindly.                                                              | 1                              | 2                       | 3                          | 4                                    | 5                      |
| TR7                                   | When faced with troublesome matters, I endeavour to maintain emotional stability.                                             | 1                              | 2                       | 3                          | 4                                    | 5                      |
| TR8                                   | When I fail at things that matter to me, I tend to feel like I'm bearing the failure alone, which leaves me feeling isolated. | 1                              | 2                       | 3                          | 4                                    | 5                      |
| TR9                                   | When feeling low, I tend to dwell on things that aren't going my way.                                                         | 1                              | 2                       | 3                          | 4                                    | 5                      |
| TR10                                  | When I feel inadequate in certain respects, I try to remind myself that most people are just as imperfect as I am.            | 1                              | 2                       | 3                          | 4                                    | 5                      |
| TR11                                  | I maintain a critical stance towards my own shortcomings and deficiencies.                                                    | 1                              | 2                       | 3                          | 4                                    | 5                      |
| TR12                                  | I cannot tolerate those aspects of my character that I dislike.                                                               | 1                              | 2                       | 3                          | 4                                    | 5                      |
| <b>Disease self-management status</b> |                                                                                                                               |                                |                         |                            |                                      |                        |
|                                       |                                                                                                                               | Not at<br>all<br><br>Compliant | Barely<br><br>Compliant | Uncertain<br><br>Uncertain | Essentially<br>compliant<br>conforms | Fully<br><br>Compliant |
| TS1                                   | I can refuse things that are not good for me.                                                                                 | 1                              | 2                       | 3                          | 4                                    | 5                      |
| TS2                                   | I wish I could be more self-disciplined.                                                                                      | 1                              | 2                       | 3                          | 4                                    | 5                      |



|                                                 |                                                                                                                                                                                                                |                              |                          |           |                    |                  |
|-------------------------------------------------|----------------------------------------------------------------------------------------------------------------------------------------------------------------------------------------------------------------|------------------------------|--------------------------|-----------|--------------------|------------------|
| TS3                                             | To others, I appear to be a person of considerable self-discipline.                                                                                                                                            | 1                            | 2                        | 3         | 4                  | 5                |
| TS4                                             | Sometimes, I get distracted by enjoyable things and end up neglecting the task at hand.                                                                                                                        | 1                            | 2                        | 3         | 4                  | 5                |
| TS5                                             | I find it difficult to concentrate.                                                                                                                                                                            | 1                            | 2                        | 3         | 4                  | 5                |
| TS6                                             | I can maintain a high level of efficiency in my work to achieve long-term objectives.                                                                                                                          | 1                            | 2                        | 3         | 4                  | 5                |
| TS7                                             | Sometimes, I can't help but do certain things, even when I know it's wrong.<br>.                                                                                                                               | 1                            | 2                        | 3         | 4                  | 5                |
| TS8                                             | I often act without thinking things through properly.                                                                                                                                                          | 1                            | 2                        | 3         | 4                  | 5                |
| <b>Consideration of future disease outcomes</b> |                                                                                                                                                                                                                |                              |                          |           |                    |                  |
|                                                 |                                                                                                                                                                                                                | Very unlikely<br>Appropriate | Somewhat<br>at<br>Comply | Uncertain | Somewhat<br>Comply | Very<br>Conforms |
| TU1                                             | I shall consider matters pertaining to future ailments and endeavour to influence them through daily actions.<br>influence them.                                                                               | 1                            | 2                        | 3         | 4                  | 5                |
| TU2                                             | In the day-to-day management of illness, I typically undertake certain measures that do not yield immediate results.                                                                                           | 1                            | 2                        | 3         | 4                  | 5                |
| TU3                                             | I concern myself only with present matters; as for future ailments, where there's a will there's a way.                                                                                                        | 1                            | 2                        | 3         | 4                  | 5                |
| TU4                                             | In the day-to-day management of my condition, my actions are guided by short-term outcomes (days or weeks).                                                                                                    | 1                            | 2                        | 3         | 4                  | 5                |
| TU5                                             | Convenience is an important factor to consider when making decisions and taking action regarding the daily management of my illness.<br>when making decisions and taking action.                               | 1                            | 2                        | 3         | 4                  | 5                |
| TU6                                             | I am willing to sacrifice present happiness or welfare to achieve a better future.                                                                                                                             | 1                            | 2                        | 3         | 4                  | 5                |
| TU7                                             | I believe it is important to be vigilant about the potential adverse outcomes of disease in the future, even if may not manifest for several years.                                                            | 1                            | 2                        | 3         | 4                  | 5                |
| TU8                                             | In the day-to-day management of illness, I believe that doing things that are important and yield long-term results is more significant than doing things that are less important but yield immediate results. | 1                            | 2                        | 3         | 4                  | 5                |

|                          |                                                                                                                                                                        |   |   |   |   |   |
|--------------------------|------------------------------------------------------------------------------------------------------------------------------------------------------------------------|---|---|---|---|---|
| TU9                      | I often overlook potential future health issues, as I believe I will resolve them before they manifest.                                                                | 1 | 2 | 3 | 4 | 5 |
| TU10                     | In the day-to-day management of illness, I believe the sacrifices made today are often unnecessary, as the future outcome of the disease can be addressed later.       | 1 | 2 | 3 | 4 | 5 |
| TU11                     | I'm only concerned with matters at hand; I'll deal with future ailments later.<br>matters.                                                                             | 1 | 2 | 3 | 4 | 5 |
| TU12                     | In the day-to-day management of illness, because my daily work has particular effectiveness,<br>, it is more important to focus on activities with long-term outcomes. | 1 | 2 | 3 | 4 | 5 |
| <b>Health Indicators</b> |                                                                                                                                                                        |   |   |   |   |   |
| TV1                      | What was your most recent fasting blood glucose reading ( )?                                                                                                           |   |   |   |   |   |
| TV2                      | What was your most recent postprandial blood glucose reading ( )?                                                                                                      |   |   |   |   |   |
| TV3                      | What was your most recent glycated haemoglobin value ( )?                                                                                                              |   |   |   |   |   |
| TV4                      | Your most recent measured height is ( ) cm, and your weight is ( ) kg,<br>waist circumference ( ) cm, and your hip measurement is ( ).                                 |   |   |   |   |   |
